# Supplementary material for: Cascade growth and performance optimization of a laminated heterointerface based on graphdiyne
Source: Royal Society of Chemistry journal article supplement (doi:10.1039/d4nj00564c), 2024-01-01
Supplement: d4nj00564c1.pdf [file d4nj00564c1.pdf]

## Supporting Information

### **Cascade growth and performance optimization of laminated heterointerface based on graphdiyne**

Ling Bai, Jingyi Liu, Luwei Zhang, Ning Wang (✉)

## **Contents:**

### **1. Experimental**

### **2. Supplementary Figures**

Figure S1.  $^1\text{H}$  NMR (a) and  $^{13}\text{C}$  NMR (b) of the precursor 1,3,5-(trimethylsilyl)ethynyl-2,4,6-trichlorobenzene.  $^1\text{H}$  NMR (c) and  $^{13}\text{C}$  NMR (d) of the precursor hexakis[(trimethylsilyl)ethynyl]benzene.

Figure S2. SEM and TEM images of reference Cl-GDY film on copper foil.

Figure S3. HRTEM images of reference Cl-GDY film exfoliated from copper substrates.

Figure S4. Overlapping and elemental mapping images of Cl-GDY film.

Figure S5. SEM and TEM images of pristine GDY film on copper foil.

Figure S6. HRTEM images of pristine GDY film exfoliated from copper substrates.

Figure S7. Overlapping and elemental mapping images of Cl-GDY/GDY film.

Figure S8. The contact angle of Cu foil, Cl-GDY, GDY, and Cl-GDY/GDY films.

Figure S9. Comparison of XPS survey spectra of Cl-GDY, GDY, and Cl-GDY/GDY film.

Figure S10. Tauc Plots for the optical band gaps. The blue, black and red line represent the curve of Cl-GDY, GDY, and Cl-GDY/GDY, respectively.

Figure S11. The photograph of the electrochemical cells with three electrodes.

Figure S12. The photograph for the carbon-based heterojunction device.

### **3. Supplementary Tables**

Table S1. Specific feeding ratio of experimental conditions.

Table S2 The summary of energy levels and band gaps from the method of optical method, and electrochemical method.

## 1. Experimental

$$\frac{1}{C_{SC}^2} A^2 = \left( \frac{2}{\varepsilon \varepsilon_p e N_D} \right) \left( E - E_{FB} - \frac{k_B T}{e} \right)$$

The M-S equation can be expressed by the above equation. Here,  $C_{SC}$  is the space-charge capacitance,  $A$  is the area,  $N_D$  is the carrier density,  $E$  is the applied voltage,  $E_{FB}$  is the flat band potential,  $k_B$  is Boltzmann's constant,  $T$  is the absolute temperature,  $e$  is the electronic charge,  $\varepsilon$  is the vacuum permittivity, and  $\varepsilon_p$  is the relative permittivity.

## 2. Supplementary Figures

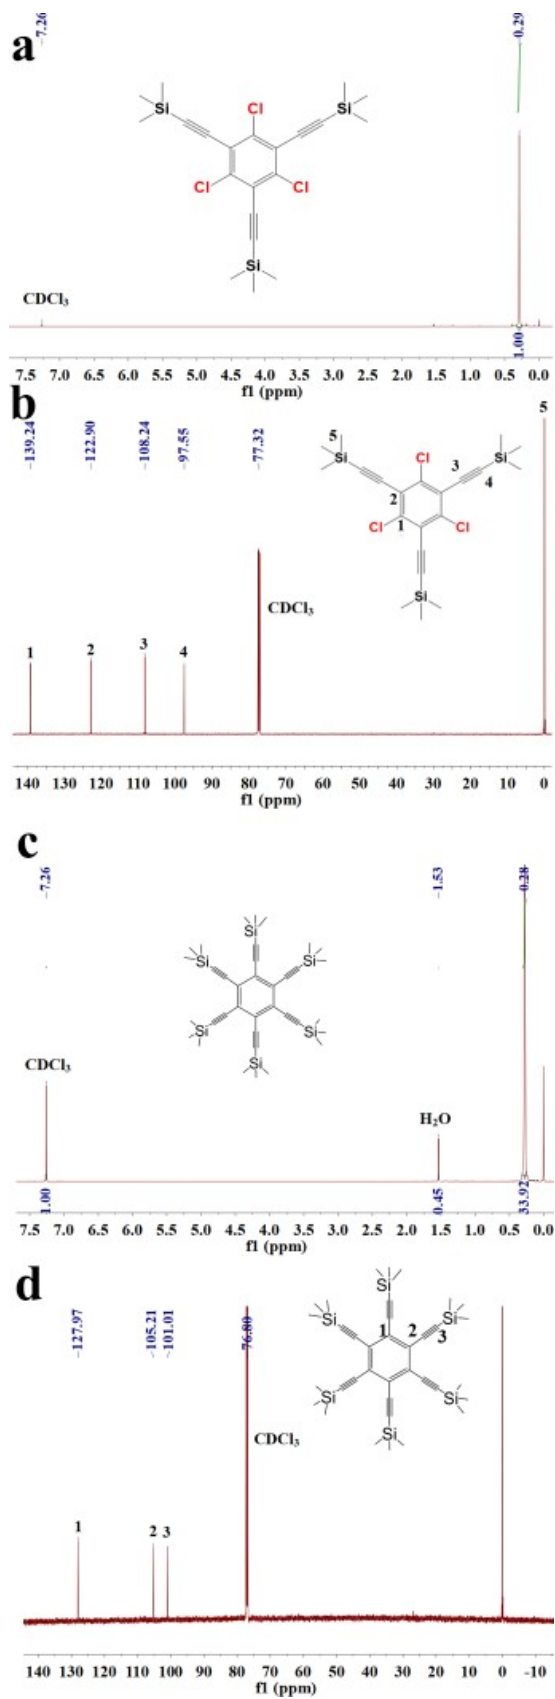

**Figure S1**  $^1\text{H}$  NMR (a) and  $^{13}\text{C}$  NMR (b) of the precursor 1,3,5-(trimethylsilyl)ethynyl-2,4,6-trichlorobenzene.  $^1\text{H}$  NMR (c) and  $^{13}\text{C}$  NMR (d) of the precursor hexakis[(trimethylsilyl)ethynyl]benzene.

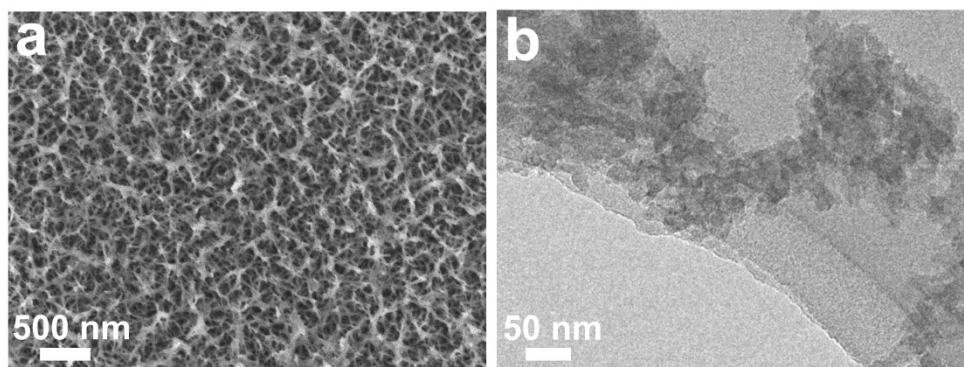

**Figure S2.** SEM (a) and (b)TEM images of reference Cl-GDY film on copper foil.

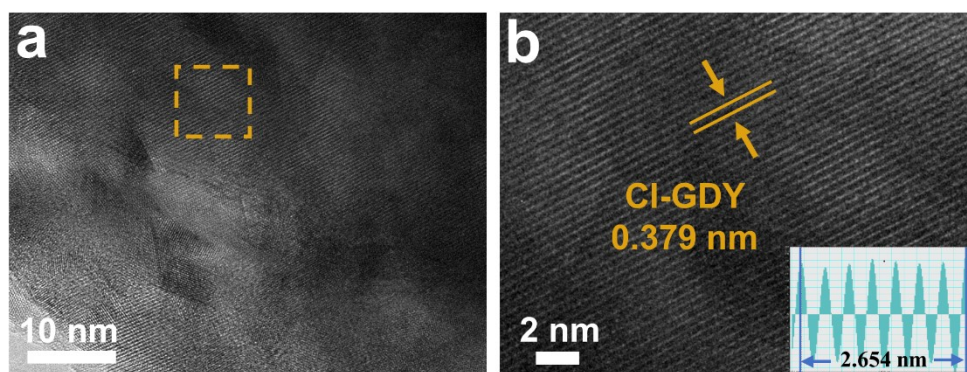

**Figure S3.** (a-b) HRTEM images of reference Cl-GDY film exfoliated from copper substrates (The inset image is SAED pattern of Cl-GDY).

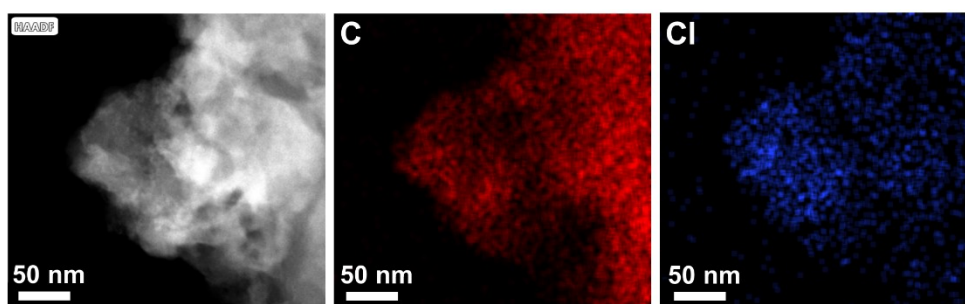

**Figure S4.** Overlapping and elemental mapping images of Cl-GDY film.



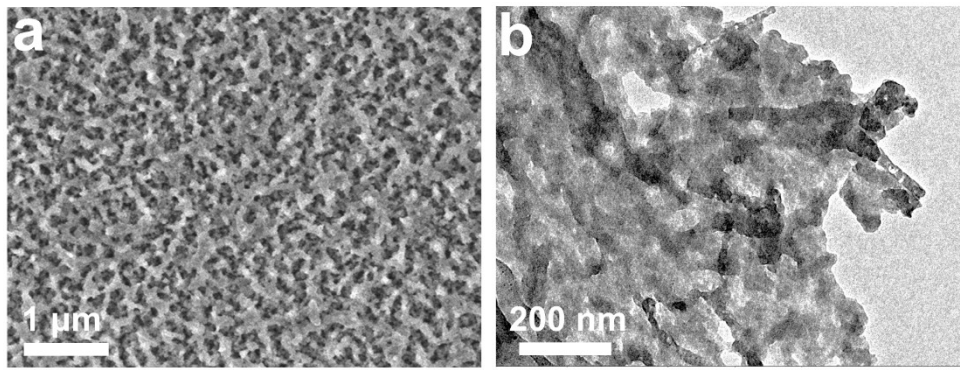

**Figure S5.** SEM (a) and (b)TEM images of pristine GDY film on copper foil.

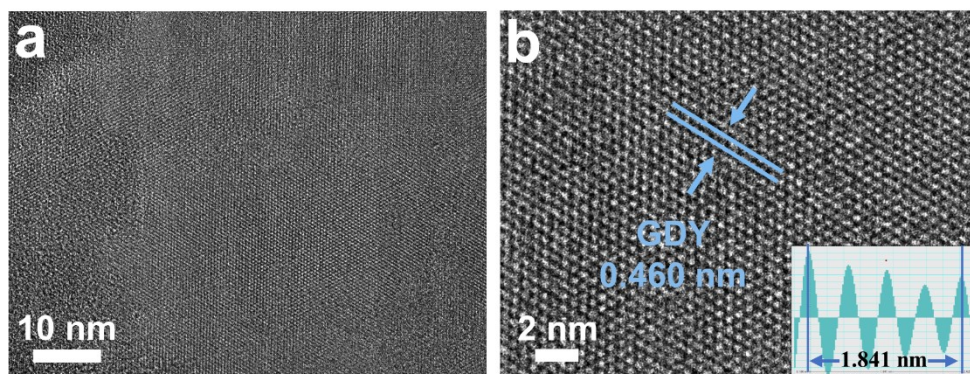

**Figure S6.** (a-b) HRTEM images of pristine GDY film exfoliated from copper substrates. And the lattice space is 0.46 nm.

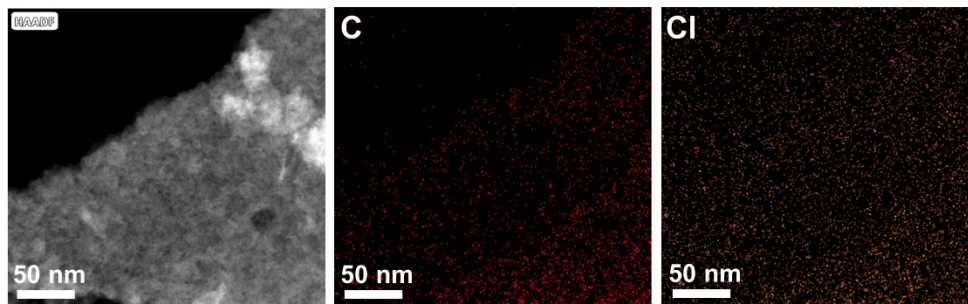

**Figure S7.** Overlapping and elemental mapping images of Cl-GDY/GDY film.

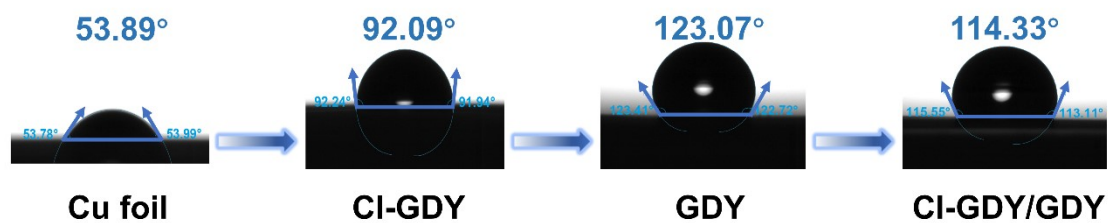

**Figure S8.** The contact angle of Cu foil, Cl-GDY, GDY, and Cl-GDY/GDY.

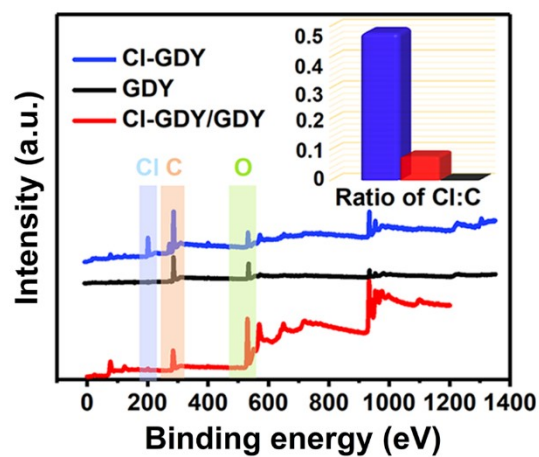

**Figure S9.** Comparison of XPS survey spectra of Cl-GDY, GDY, and Cl-GDY/GDY film. The inset graph shows the weight ratio of chlorine to carbon atoms.

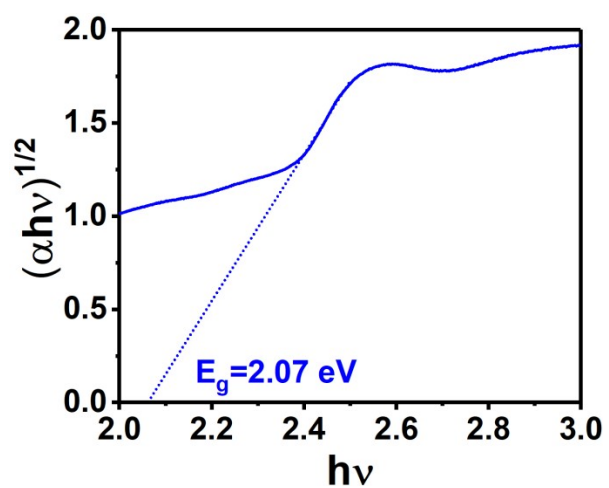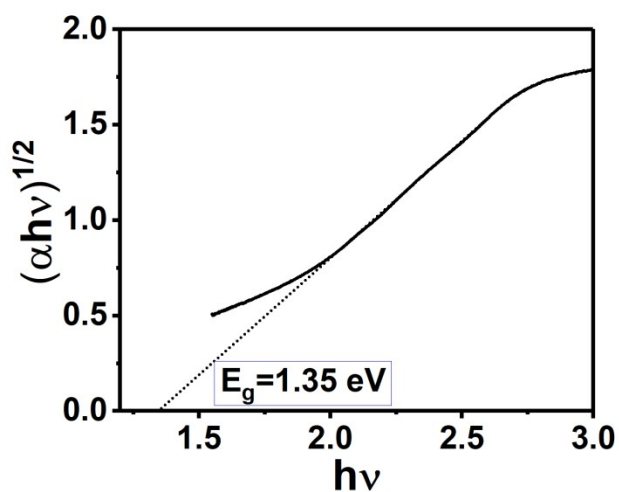



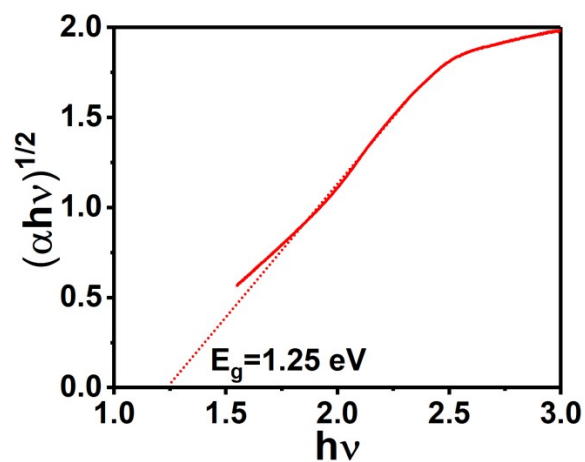

**Figure S10.** Tauc Plots for the optical band gaps. The blue, black and red line represent the curve of Cl-GDY, GDY, and Cl-GDY/GDY, respectively.

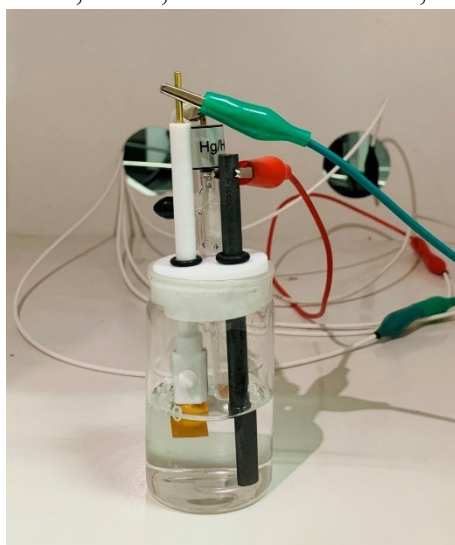

**Figure S11.** The photograph of the electrochemical cells with three electrodes, in which the copper foil serves as the working electrode, the carbon rod acts as the counter electrode, and the saturated calomel electrode (SCE) is used as the reference electrode.

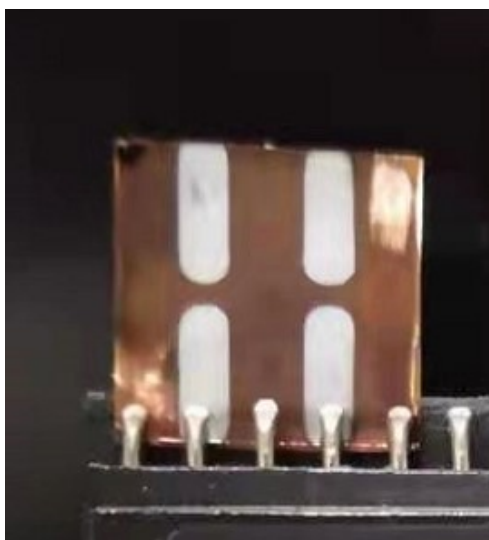

**Figure S12.** The photograph for the carbon-based heterojunction device.

### 3. Supplementary Tables

Table S1 Specific feeding ratio of experimental conditions.

| Reagent                                      | Cl-GDY | GDY       |
|----------------------------------------------|--------|-----------|
| Precursor (mg)                               | 15     | 15        |
| THF (mL)                                     | 30     | 30        |
| TBAF (mL)                                    | 0.6    | 0.6       |
| Pyridine (mL)                                | 1      | 1         |
| TMEDA (mL)                                   | 10     | 10        |
| Acetone used to dissolve the precursors (mL) | 30     | 30        |
| Acetone added in the reaction bottle (mL)    | 100    | 100       |
| Color of film                                | Orange | Brown-red |

Table S2 The summary of energy levels and band gaps from the method of optical method, and electrochemical method.

|            | Optical Method <sup>a</sup> |                 |          | Electrochemical Method <sup>b</sup> |        |         |
|------------|-----------------------------|-----------------|----------|-------------------------------------|--------|---------|
|            | Valence Band                | Conduction Band | Band Gap | 22 Hz                               | 100 Hz | 1000 Hz |
| Cl-GDY     | 1.10                        | 3.17            | 2.07     | 0.113                               | 0.138  | 0.253   |
| Cl-GDY/GDY | 0.94                        | 2.19            | 1.25     | 0.077                               | 0.058  | 0.210   |
| GDY        | 1.22                        | 2.57            | 1.35     | -                                   | -      | -       |

<sup>a</sup>The units is eV. <sup>b</sup>The units is V. The value of conduction band obtained from the measured  $E_{FB}$  under different applied frequency. All the data is compared to normal hydrogen electrodes (NHE).
